# Supplementary material for: Ferritin and Ferritin-to-Hemoglobin Ratio as Promising Prognostic Biomarkers of Severity in Acute Pancreatitis—A Cohort Study
Source: MDPI journal article supplement (doi:10.3390/biomedicines12010106), 2024-01-04
Supplement: s1 [file s1]

*Supplementary Table S1 . The potential of SF, FHR and other biomarkers in predicting disease severity (MSAP), organ failure (OF) and mortality in the cohort*

| Parameter          | MSAP                   |            |                          | OF                     |            |                         | Death                   |            |                         |
|--------------------|------------------------|------------|--------------------------|------------------------|------------|-------------------------|-------------------------|------------|-------------------------|
|                    | AUC<br>(95%CI)         | p<br>value | Cut-off<br>value(se; sp) | AUC<br>(95%CI)         | p<br>value | Cut-off<br>value(se;sp) | AUC<br>(95%CI)          | p<br>value | Cut-off<br>value(se;sp) |
| Serrum<br>ferritin | 0.640<br>(0.537;0.743) | 0.011      | 202.81 (76%;<br>51%)     | 0.761<br>(0.652;0.870) | 0.000      | 437.81<br>(71%; 75%)    | 0.802<br>(0.637; 0.966) | 0.013      | 516<br>(83%; 74%)       |
| FHR                | 0.666<br>(0.567;0.766) | 0.002      | 13.94 (78%;<br>51%)      | 0.769<br>(0.659;0.879) | 0.000      | 45.63<br>(61%; 88%)     | 0.794<br>(0.634;0.954)  | 0.016      | 51.58<br>(66%;86%)      |
| Hematocrit         | 0.383<br>(0.281;0.485) | 0.033      | 40.35 (40%;<br>39%)      | 0.426<br>(0.268;0.584) | 0.292      |                         | 0.462<br>(0.184;0.741)  | 0.755      |                         |
| Leucocytes         | 0.598<br>(0.495;0.701) | 0.074      |                          | 0.651<br>(0.500;0.801) | 0.031      | 14.79<br>(66%;74%)      | 0.627<br>(0.361;0.893)  | 0.295      |                         |
| CRP                | 0.534<br>(0.428;0.640) | 0.533      |                          | 0.634<br>(0.504;0.765) | 0.059      | 12.04<br>(95%;23%)      | 0.577<br>(0.390;0.765)  | 0.525      |                         |
| Urea               | 0.594<br>(0.491;0.697) | 0.087      |                          | 0.798<br>(0.683;0.914) | 0.000      | 42.50<br>(71%;75%)      | 0.787<br>(0.604;0.970)  | 0.018      | 42.50<br>(83%;70%)      |
| Creatinine         | 0.627<br>(0.525;0.728) | 0.021      | 0.98 (42%;<br>81%))      | 0.863<br>(0.760;0.967) | 0.000      | 1.00<br>(85%;82%)       | 0.837<br>(0.663;1.000)  | 0.006      | 1.20<br>(83%;84%)       |
| D-dimers           | 0.617<br>(0.505;0.730) | 0.051      |                          | 0.753<br>(0.626;0.881) | 0.001      | 1507<br>(50%;90%)       | 0.842<br>(0.696;0.989)  | 0.021      |                         |
| Fibrinogen         | 0.482<br>(0.372;0.592) | 0.753      |                          | 0.439<br>(0.291;0.587) | 0.391      |                         | 0.255<br>(0.070;0.440)  | 0.045      |                         |
| Procalcitonin      | 0.623<br>(0.519;0.727) | 0.025      | 0.16 (50%;<br>75%)       | 0.776<br>(0.658;0.895) | 0.000      | 0.18<br>(85%;72%)       | 0.827<br>(0.714;0.939)  | 0.007      |                         |
| LDH                | 0.551<br>(0.430;0.672) | 0.413      |                          | 0.796<br>(0.675;0.917) | 0.000      | 408<br>(58%;91%)        | 0.731<br>(0.444;1.000)  | 0.084      |                         |

*FHR-ferritin to hemoglobin ratio, CRP-C reactive protein; LDH-Lactate dehydrogenaze; AUC value-area under the curve; 95%CI-95% confidence interval, Se-sensitivity, Sp-specificity*
